# Supplementary material for: A Modular Library of Small Molecule Signals Regulates Social Behaviors in Caenorhabditis elegans
Source: PubMed Central journal article supplement (PMC3254649; doi:10.1371/journal.pbio.1001237), 2012-01-10

## Supporting Information

### **A modular library of small molecule signals regulates social behaviors in *Caenorhabditis elegans***

Jagan Srinivasan<sup>1§</sup>, Stephan H. von Reuss<sup>2§</sup>, Neelanjan Bose,<sup>2</sup> Alon Zaslaver,<sup>1</sup> Parag Mahanti<sup>2</sup>, Margaret C. Ho<sup>1</sup>, Oran G. O'Doherty,<sup>2</sup> Arthur S. Edison,<sup>3</sup> Paul W. Sternberg,<sup>1\*</sup> and Frank C. Schroeder<sup>2\*</sup>

<sup>1</sup>Howard Hughes Medical Institute and Division of Biology, California Institute of Technology, Pasadena, CA 91125; <sup>2</sup>Boyce Thompson Institute and Department of Chemistry and Chemical Biology, Cornell University, Ithaca, NY 14853; <sup>3</sup>Department of Biochemistry and Molecular Biology, and National High Magnetic Field Laboratory, University of Florida, Gainesville, FL 32610-0245. <sup>§</sup>These authors contributed equally.

## Supporting Methods

### 1. Calculation of number of molecules of icas#3 in one L4 worm volume at 100 fM.

$V_{YA}$  : volume of *C. elegans* young adult [1];  $c$ : concentration (100 fM);  $N_A$ : Avogadro's number.

$$V_{YA} = 3 \cdot 10^6 \mu\text{m}^3 = 3 \cdot 10^{-9} \text{ L}; c = 10 \text{ fM} = 10^{-14} \text{ M}$$

$$n = V_{YA} \cdot c \cdot N_A = 3 \cdot 10^{-9} \text{ L} \cdot 10^{-14} \text{ mol} \cdot \text{L}^{-1} \cdot 6.022 \cdot 10^{23} \text{ mol}^{-1} = 18 \text{ molecules.}$$

Result: there are 18 icas#3 molecules contained in one worm volume of agar at an icas#3 concentration of 10 fM (femtomolar).

## 2. Synthesis of indole ascarosides

### 2.1 Synthesis of ascr#9.

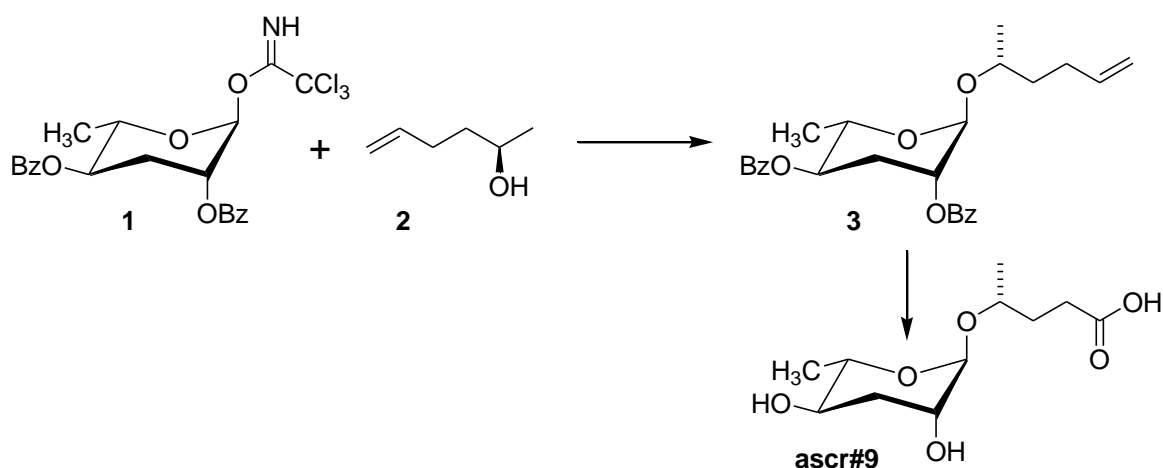

(*R*)-hex-5-en-2-ol **2** (32 mg, 0.32 mmol, prepared as described [2]) was coupled to trichloroacetimidate **1** (150 mg, 0.3 mmol, [2]) using the conditions described for the synthesis of ascr#6. The resulting glycoside **3** (92 mg, 0.21 mmol) was dissolved in acetone (2 ml) and treated with 2 ml of a 1 M solution of potassium permanganate. After 30 min, the reaction mixture was poured into a mixture of ice-cold saturated aqueous sodium chloride solution (5 ml), acetic acid (0.1 ml), and dichloromethane (5 ml). The organic phase was separated and the aqueous phase extracted with two 5 ml-portions of dichloromethane. The combined organic extracts were dried over sodium sulfate, evaporated to dryness and re-dissolved in a mixture of 0.5 M aqueous lithium hydroxide (2 ml) and dioxane (6 ml). The mixture was stirred for 3 h at 70 °C, then cooled to 23 °C and acidified with 0.2 M aqueous hydrochloric acid. The mixture was evaporated to dryness and purified via Combiflash column

chromatography using a methanol-dichloromethane solvent gradient, yielding 15.6 mg (0.063 mmol) of pure ascr#9 as a viscous oil.

### Spectroscopic data for ascr#9.

$^1\text{H}$  (600 MHz) and  $^{13}\text{C}$  (126 MHz) NMR spectroscopic data for **ascr#9** were acquired in methanol- $d_4$ . Chemical shifts were referenced to ( $\text{CD}_2\text{HOD}$ ) = 3.31 ppm and ( $\text{CD}_2\text{HOD}$ ) = 49.05 ppm. Coupling constants are given in Hertz [Hz].  $^1\text{H}$  NMR (600 MHz,  $\text{CD}_3\text{OD}$ ):  $\delta$  4.65 (s, 1H), 3.84 (m, 1H), 3.72 (m, 1H), 3.61 (dq, 1H,  $J = 9.4$  Hz,  $J = 6.1$  Hz), 3.51 (ddd, 1H,  $J = 11.2$  Hz,  $J = 9.5$  Hz,  $J = 4.5$  Hz), 2.43 (m, 2H), 1.95 (dt, 1H,  $J = 13.1$  Hz,  $J = 3.5$  Hz), 1.71-1.87 (m, 3H), 1.22 (d, 3H,  $J = 6.1$  Hz), 1.15 (d, 3H,  $J = 6.1$  Hz) ppm;  $^{13}\text{C}$  NMR (126 MHz,  $\text{CD}_3\text{OD}$ ):  $\delta$  174.5, 97.3; 71.5, 71.4, 69.9, 68.4, 36.0, 33.5, 31.3, 19.1, 18.1 ppm; ESI-MS ( $m/z$ ): [M-H] 247.2.

### 2.2 Synthesis of ascr#10.

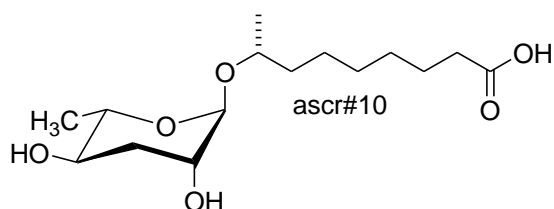

A stirred solution of ascr#3 (3.2 mg, 10.6  $\mu\text{mol}$ ) [2] in 10 ml of ethanol was hydrogenated using palladium on activated carbon (10% Pd, 1 atm  $\text{H}_2$  pressure) at 23  $^\circ\text{C}$  for 18 h. After completion, the reaction was evaporated to dryness, and the residue filtered over a short pad of silica using a 1:8 (v/v) mixture of methanol and dichloromethane yielding 3.0 mg (9.9  $\mu\text{mol}$ ) of pure ascr#10.

### Spectroscopic data for ascr#10.

$^1\text{H}$  (600 MHz) and  $^{13}\text{C}$  (126 MHz) NMR spectroscopic data for **ascr#10** were acquired in methanol- $d_4$ . Chemical shifts were referenced to ( $\text{CD}_2\text{HOD}$ ) = 3.31 ppm and ( $\text{CD}_2\text{HOD}$ ) = 49.05 ppm. Coupling constants are given in Hertz [Hz].  $^1\text{H}$  NMR (600 MHz,  $\text{CD}_3\text{OD}$ ):  $\delta$  4.64 (s, 1H), 3.78 (m, 1H), 3.71 (m, 1H), 3.63 (dq, 1H,  $J = 9.3$  Hz,  $J = 6.2$  Hz), 3.51 (ddd, 1H,  $J = 11.2$  Hz,  $J = 9.3$  Hz,  $J = 4.6$  Hz), 2.27 (t, 2H,  $J = 7.4$  Hz), 1.94 (dt, 1H,  $J = 13.0$  Hz,  $J = 3.7$  Hz), 1.77 (ddd, 1H,  $J = 13.3$  Hz,  $J = 11.5$  Hz,  $J = 3.0$  Hz), 1.61 (m, 2H), 1.56 (m, 1H), 1.46 (m, 1H), 1.32-1.38 (m, 6H), 1.21 (d, 3H,  $J = 6.2$  Hz), 1.12 (d, 3H,  $J = 6.1$  Hz) ppm;  $^{13}\text{C}$  NMR (126 MHz,  $\text{CD}_3\text{OD}$ ):  $\delta$  177.7, 97.3, 72.3, 71.0, 69.8, 68.1, 38.1, 38.2, 35.7, 34.9, 30.0, 26.5, 26.0, 19.0, 18.0 ppm; ESI-MS ( $m/z$ ): [M-H] 303.2.

### 2.3 Synthesis of icas#1.

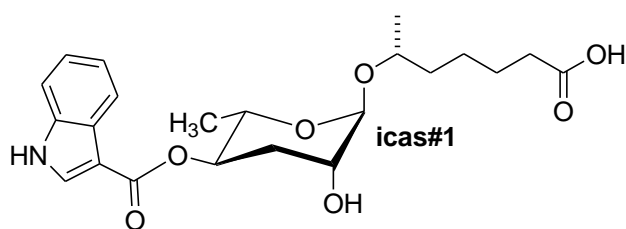

Conversion of ascr#1 into the corresponding methyl ester. Ascr#1 (10 mg, 0.036 mmol), prepared using previously described methods [2], was dissolved in a mixture of toluene (1 mL) and methanol (1 mL), and a solution of trimethylsilyldiazomethane (2 M solution in hexane, 50  $\mu$ L, 0.1 mmol) was added. After stirring for 20 min at 23  $^{\circ}$ C, excess trimethylsilyldiazomethane was destroyed by addition of acetic acid (40  $\mu$ L) and solvents were removed *in vacuo*, yielding ascr#1 methyl ester (10.3 mg, 0.035 mmol) as a viscous oil.

Preparation of a solution of indole-3-carboxyl chloride. A well-stirred suspension of indole-3-carboxylic acid (67.7 mg, 0.42 mmol) in dry dichloromethane (2 ml) containing a small amount of dimethylformamide (20  $\mu$ L) was treated with oxalyl chloride (0.84 mmol, 107 mg, 72  $\mu$ L) at 0  $^{\circ}$ C. Following addition to the oxalyl chloride, the mixture was stirred for 20 min at 23  $^{\circ}$ C, which produced a clear, slightly yellow solution. This solution was evaporated to dryness *in vacuo* at 0.1 Torr to ensure removal of excess oxalyl chloride and subsequently redissolved in 2 ml of dry dichloromethane.

Preparation of icas#1. The sample of ascr#1 methyl ester (10.3 mg, 0.035 mmol) was dissolved in 1 ml of dry dichloromethane and diisopropylethylamine was added (129 mg, 1 mmol). The resulting solution was equipped with an effective stir bar and cooled to -20  $^{\circ}$ C. Subsequently, the above solution of indole-3-carboxylic acid chloride was added drop wise over a period of 10 min with vigorous stirring. The well-stirred reaction was gradually warmed to -7  $^{\circ}$ C at which temperature ice-cold saturated aqueous sodium bicarbonate solution (2 ml) was added. The biphasic mixture was allowed to warm to 20  $^{\circ}$ C and extracted three times with ethyl acetate. The combined ethyl acetate extracts were evaporated *in vacuo* and subjected to column chromatography on silica gel using 0-10% methanol in dichloromethane. Fractions containing the bis-2,4-*O*-(-indole-3-carbonyl)-derivative of the ascr#1 methyl ester were combined, evaporated to dryness and treated with a mixture of 3 ml aqueous 0.5 M lithium hydroxide solution and 7 ml dioxane at 67  $^{\circ}$ C for 3 h. Subsequently, the reaction mixture was cooled to 23  $^{\circ}$ C, neutralized by addition of 0.2 M aqueous hydrochloric acid and evaporated *in vacuo*. The residue was purified by HPLC, using the Agilent 1100 Series HPLC system equipped with an Agilent Eclipse XDB C-18 column (25 cm x 9.4 mm, 5  $\mu$ m particle

diameter). Acetonitrile and 0.1% aqueous acetic acid were used as solvents, increasing the percentage of acetonitrile from 15% at 0 min to 85% at 30 min. Icas#1-containing fractions were evaporated yielding 5.8 mg (0.014 mmol) of the target compound as a wax-like white solid.

**Spectroscopic data of icas#1.**  $^1\text{H}$  (600 MHz),  $^{13}\text{C}$  (126 MHz), and HMBC NMR spectroscopic data for **icas#1** in methanol- $d_4$ . Chemical shifts were referenced to ( $\text{CD}_2\text{HOD}$ ) = 3.31 ppm and ( $\text{CD}_2\text{HOD}$ ) = 49.05 ppm. Coupling constants are given in Hertz [Hz]; \*: interchangeable.

| Position | $\delta^{13}\text{C}$ [ppm] | $\delta^1\text{H}$ [ppm] | $^1\text{H}$ - $^1\text{H}$ -coupling constants                                                |
|----------|-----------------------------|--------------------------|------------------------------------------------------------------------------------------------|
| 1        | 177.6                       |                          |                                                                                                |
| 2        | 35.1                        | 2.35                     | $J_{2,3} = 7.4$                                                                                |
| 3        | 26.6*                       | 1.45-1.70                |                                                                                                |
| 4        | 26.2*                       | 1.45-1.70                |                                                                                                |
| 5        | 38.1                        | 1.45-1.70                |                                                                                                |
| 6        | 72.7                        | 3.86                     |                                                                                                |
| 7        | 19.4                        | 1.17                     | $J_{6,7} = 6.1$                                                                                |
| 1'       | 97.7                        | 4.75                     |                                                                                                |
| 2'       | 69.6                        | 3.79                     |                                                                                                |
| 3'       | 33.5                        | 2.01 (ax)                | $J_{3'\text{ax},3'\text{eq}} = 13.0,$<br>$J_{3'\text{ax},4'} = 11.4, J_{2',3'\text{ax}} = 2.9$ |
|          |                             | 2.21 (eq)                | $J_{2',3'\text{eq}} = 3.2, J_{3'\text{eq},4'} = 4.7$                                           |
| 4'       | 70.6                        | 5.12                     | $J_{4',5'} = 9.6$                                                                              |
| 5'       | 68.8                        | 4.05                     | $J_{5',6'} = 6.3$                                                                              |
| 6'       | 18.3                        | 1.24                     |                                                                                                |
| 2''      | 133.5                       | 7.97                     |                                                                                                |
| 3''      | 108.4                       |                          |                                                                                                |
| 3''-COO  | 166.5                       |                          |                                                                                                |
| 3a''     | 127.3                       |                          |                                                                                                |
| 4''      | 121.9                       | 8.02                     | $J_{4'',5''} = 7.2$                                                                            |
| 5''      | 122.7                       | 7.16                     |                                                                                                |
| 6''      | 123.8                       | 7.29                     |                                                                                                |
| 7''      | 113.1                       | 7.44                     | $J_{6'',7''} = 7.9$                                                                            |
| 7a''     | 138.2                       |                          |                                                                                                |

## 2.4 Synthesis of icas#3.

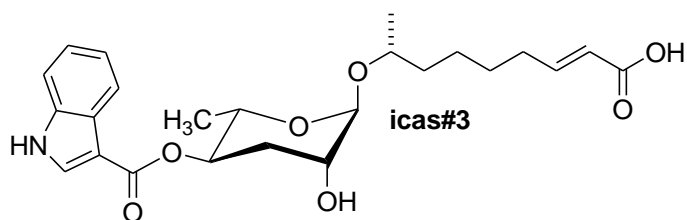

Conversion of ascr#3 into the corresponding methyl ester. Ascr#3 (5.2 mg, 0.017 mmol), prepared as described previously [2], was dissolved in a mixture of toluene (1 mL) and methanol (1 mL). To this mixture, a solution of trimethylsilyldiazomethane (2 M solution in hexane, 25  $\mu$ L, 0.05 mmol) was added. After stirring for 20 min at 23  $^{\circ}$ C, excess trimethylsilyldiazomethane was destroyed by addition of acetic acid (30  $\mu$ L) and solvents were removed *in vacuo*, yielding ascr#3 methyl ester (5.3 mg, 0.017 mmol) as a viscous oil.

Preparation of icas#3. The sample of ascr#3 methyl ester (10.3 mg, 0.035 mmol) was reacted with indole carbonyl chloride as describes above for the preparation of icas#1, using proportionally smaller amounts of all reagents. Purification of the crude reaction products via HPLC using the conditions described above yielded icas#3 (2.3 mg, 5.2  $\mu$ mol) as a colorless oil. NMR spectroscopic data are listed below. For copies of the  $^1\text{H}$  NMR, HSQC, and HMBC spectra, see section 4 below “Supporting NMR spectra”.

**Spectroscopic data of icas#3.**  $^1\text{H}$  (600 MHz),  $^{13}\text{C}$  (126 MHz), and HMBC NMR spectroscopic data for **icas#3** in methanol- $d_4$ . Chemical shifts were referenced to ( $\text{CD}_2\text{HOD}$ ) = 3.31 ppm and ( $\text{CD}_2\text{HOD}$ ) = 49.05 ppm. Coupling constants are given in Hertz [Hz].

| Position     | $\delta^{13}\text{C}$ [ppm] | $\delta^1\text{H}$ [ppm] | $^1\text{H}$ - $^1\text{H}$ -coupling constants     | Relevant HMBC correlations            |
|--------------|-----------------------------|--------------------------|-----------------------------------------------------|---------------------------------------|
| 1            | 173.7                       |                          |                                                     |                                       |
| 2            | 126.7                       | 5.82                     | $J_{2,3} = 15.1$                                    |                                       |
| 3            | 147.8                       | 6.79                     | $J_{3,4} = 6.9$                                     | C-1, C-4, C-5                         |
| 4            | 33.6                        | 2.23                     |                                                     | C-2, C-3, C5, C-6                     |
| 5            | 29.9                        | 1.54                     |                                                     | C-4, C-6                              |
| 6            | 27.2                        | 1.51                     |                                                     |                                       |
| 7            | 38.7                        | 1.53                     |                                                     | C-5, C-6, C-8                         |
| 8            | 73.1                        | 3.83                     |                                                     | C-6, C-7, C-9                         |
| 9            | 19.9                        | 1.15                     | $J_{8,9} = 6.1$                                     | C-7, C-8                              |
| 1 $^{\circ}$ | 98.0                        | 4.73                     |                                                     | C-3 $^{\circ}$ , C-5 $^{\circ}$ , C-8 |
| 2 $^{\circ}$ | 70.1                        | 3.77                     |                                                     | C-4 $^{\circ}$                        |
| 3 $^{\circ}$ | 33.8                        | 1.98 (ax)                | $J_{3^{\circ}\text{ax},3^{\circ}\text{eq}} = 13.0,$ |                                       |

|         |       |           |                                           |                           |
|---------|-------|-----------|-------------------------------------------|---------------------------|
|         |       |           | $J_{3',ax,4'} = 11.4, J_{2',3',ax} = 2.9$ |                           |
|         |       | 2.19 (eq) | $J_{2',3',eq} = 3.2, J_{3',eq,4'} = 4.7$  | C-4'                      |
| 4'      | 70.9  | 5.09      | $J_{4',5'} = 9.6$                         | C-6'                      |
| 5'      | 69.1  | 4.02      | $J_{5',6'} = 6.3$                         | C-4'                      |
| 6'      | 18.8  | 1.21      |                                           | C4', C-5'                 |
| 2''     | 133.9 | 7.94      |                                           | C-3'', C-3a'', C-7a''     |
| 3''     | 108.8 |           |                                           |                           |
| 3''-COO | 167.0 |           |                                           |                           |
| 3a''    | 127.9 |           |                                           |                           |
| 4''     | 122.3 | 7.99      | $J_{4'',5''} = 7.4$                       | C-6'', C-7a'',<br>3''-COO |
| 5''     | 123.0 | 7.15      |                                           | C-3a'', C-7''             |
| 6''     | 124.2 | 7.18      |                                           | C-4'', C-7a''             |
| 7''     | 113.5 | 7.42      | $J_{6'',7''} = 7.9$                       | C-3a'', C-5''             |
| 7a''    | 138.8 |           |                                           |                           |

## 2.5 Synthesis of icas#7.

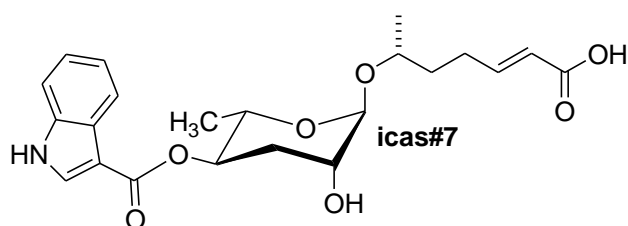

A standard sample of icas#7 (120  $\mu$ g) was obtained from ascr#7 (0.5 mg) [2] as described above for the preparation of icas#1 from ascr#1.

**Spectroscopic data of icas#7.**  $^1\text{H}$  (600 MHz) NMR spectroscopic data for icas#7 were obtained using methanol- $d_4$ . Chemical shifts were referenced to  $(\text{CD}_2\text{HOD}) = 3.31$  ppm. Coupling constants are given in Hertz [Hz].

| Position | $^1\text{H}$ [ppm] | $^1\text{H}$ - $^1\text{H}$ -coupling constants |
|----------|--------------------|-------------------------------------------------|
| 2        | 5.84               | $J_{2,3} = 15.3$                                |
| 3        | 6.99               | $J_{3,4} = 6.8$                                 |
| 4        | 2.40               |                                                 |
|          | 2.33               |                                                 |
| 5        | 1.70               |                                                 |
|          | 1.65               |                                                 |
| 6        | 3.91               |                                                 |
| 7        | 1.18               | $J_{6,7} = 6.1$                                 |

|                 |           |                                                                                                                       |
|-----------------|-----------|-----------------------------------------------------------------------------------------------------------------------|
| 1 <sup>c</sup>  | 4.75      |                                                                                                                       |
| 2 <sup>c</sup>  | 3.80      |                                                                                                                       |
| 3 <sup>c</sup>  | 2.03 (ax) | $J_{3^{\text{ax}},3^{\text{eq}}} = 13.0, J_{3^{\text{ax}},4^{\text{c}}} = 11.4, J_{2^{\text{c}},3^{\text{ax}}} = 2.9$ |
|                 | 2.21 (eq) | $J_{2^{\text{c}},3^{\text{eq}}} = 3.2, J_{3^{\text{eq}},4^{\text{c}}} = 4.7$                                          |
| 4 <sup>c</sup>  | 5.12      | $J_{4^{\text{c}},5^{\text{c}}} = 9.6$                                                                                 |
| 5 <sup>c</sup>  | 4.07      | $J_{5^{\text{c}},6^{\text{c}}} = 6.3$                                                                                 |
| 6 <sup>c</sup>  | 1.24      |                                                                                                                       |
| 2 <sup>cc</sup> | 7.97      |                                                                                                                       |
| 4 <sup>cc</sup> | 8.04      | $J_{4^{\text{cc}},5^{\text{cc}}} = 7.5$                                                                               |
| 5 <sup>cc</sup> | 7.15      |                                                                                                                       |
| 6 <sup>cc</sup> | 7.16      |                                                                                                                       |
| 7 <sup>cc</sup> | 7.43      | $J_{6^{\text{cc}},7^{\text{cc}}} = 7.9$                                                                               |

## 2.6 Synthesis of icas#9.

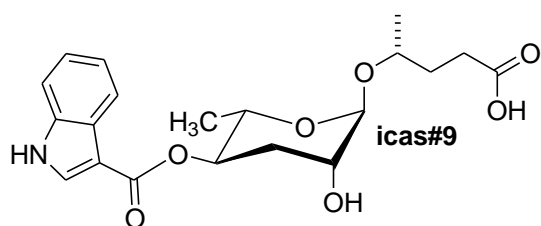

Icas#9 was obtained from ascr#9 as described above for the preparation of icas#1 from ascr#1. NMR-spectroscopic data are in agreement with published data [3].



### 3. References cited in “Supporting Methods”

1. Knight CG, Patel MN, Azevedo RB, Leroi AM (2002) A novel mode of ecdysozoan growth in *Caenorhabditis elegans*. *Evol Dev* 4: 16-27.
2. Pungaliya C, Srinivasan J, Fox BW, Malik RU, Ludewig AH, et al. (2009) A shortcut to identifying small molecule signals that regulate behavior and development in *Caenorhabditis elegans*. *Proc Natl Acad Sci USA* 106: 7708-7713.
3. Butcher RA, Ragains JR, Clardy J (2009) An indole-containing dauer pheromone component with unusual dauer inhibitory activity at higher concentrations. *Org Lett* 11: 3100-3103.

### 4. Supporting NMR Spectra

**NMR Spectrum 1.** Wild-type (N2) metabolome fraction containing *daf-22* dependent indole derivatives (red boxes), central section of dqfCOSY NMR spectrum (CDCl<sub>3</sub>, 600 MHz).

**NMR Spectrum 2.** Synthetic icas#3, <sup>1</sup>H NMR spectrum (CD<sub>3</sub>OD, 600 MHz).

**NMR Spectrum 3.** Synthetic icas#3, <sup>1</sup>H, <sup>13</sup>C-HSQC spectrum (CD<sub>3</sub>OD, 600 MHz).

**NMR Spectrum 4.** Synthetic icas#3, <sup>1</sup>H, <sup>13</sup>C-HMBC spectrum (CD<sub>3</sub>OD, 600 MHz).

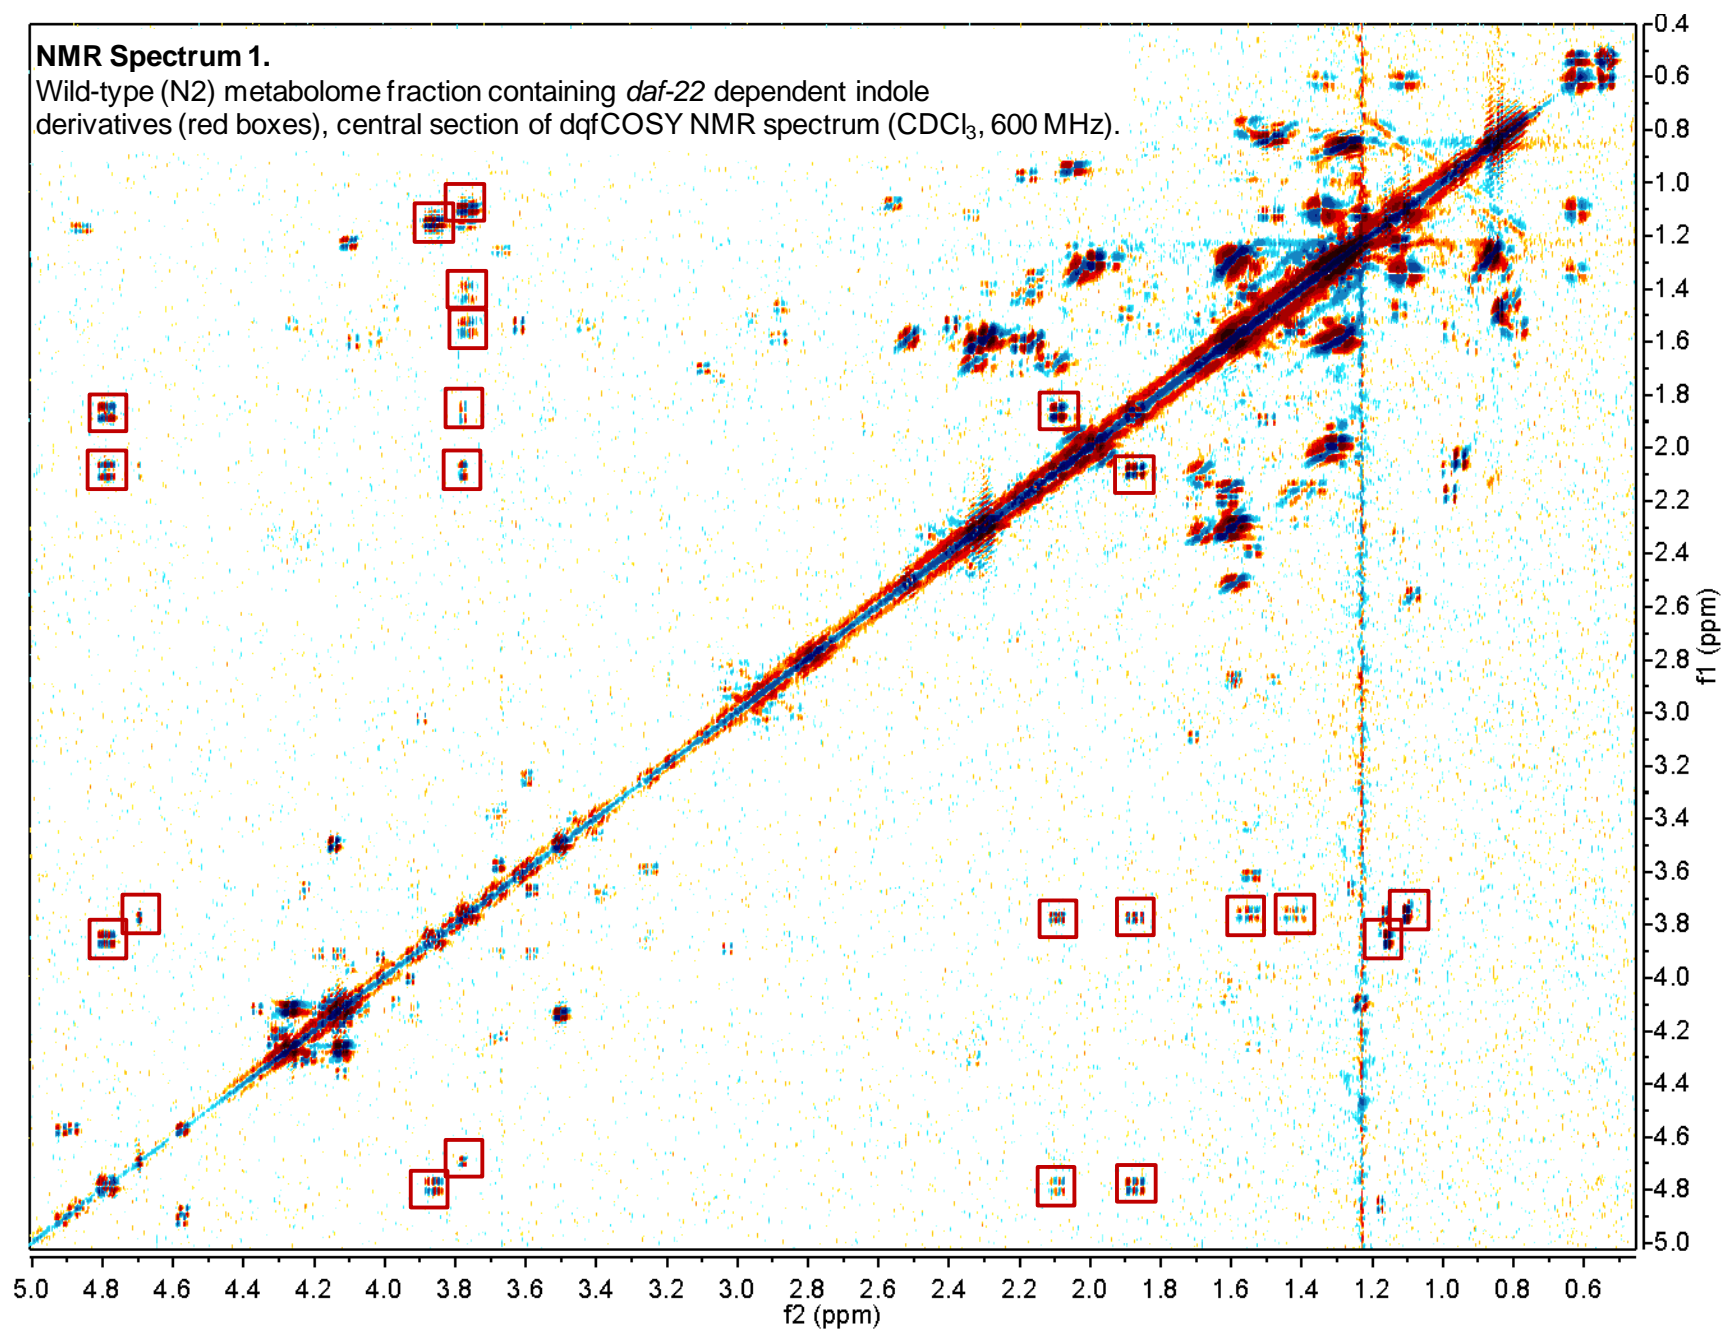

**NMR Spectrum 2.**Synthetic icas#3, <sup>1</sup>H NMR spectrum (CD<sub>3</sub>OD, 600 MHz)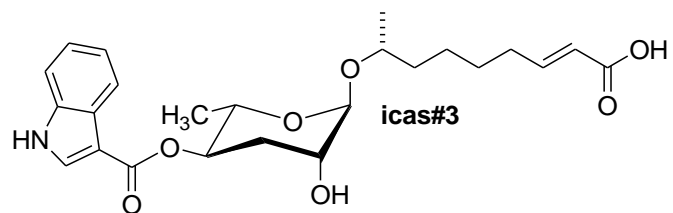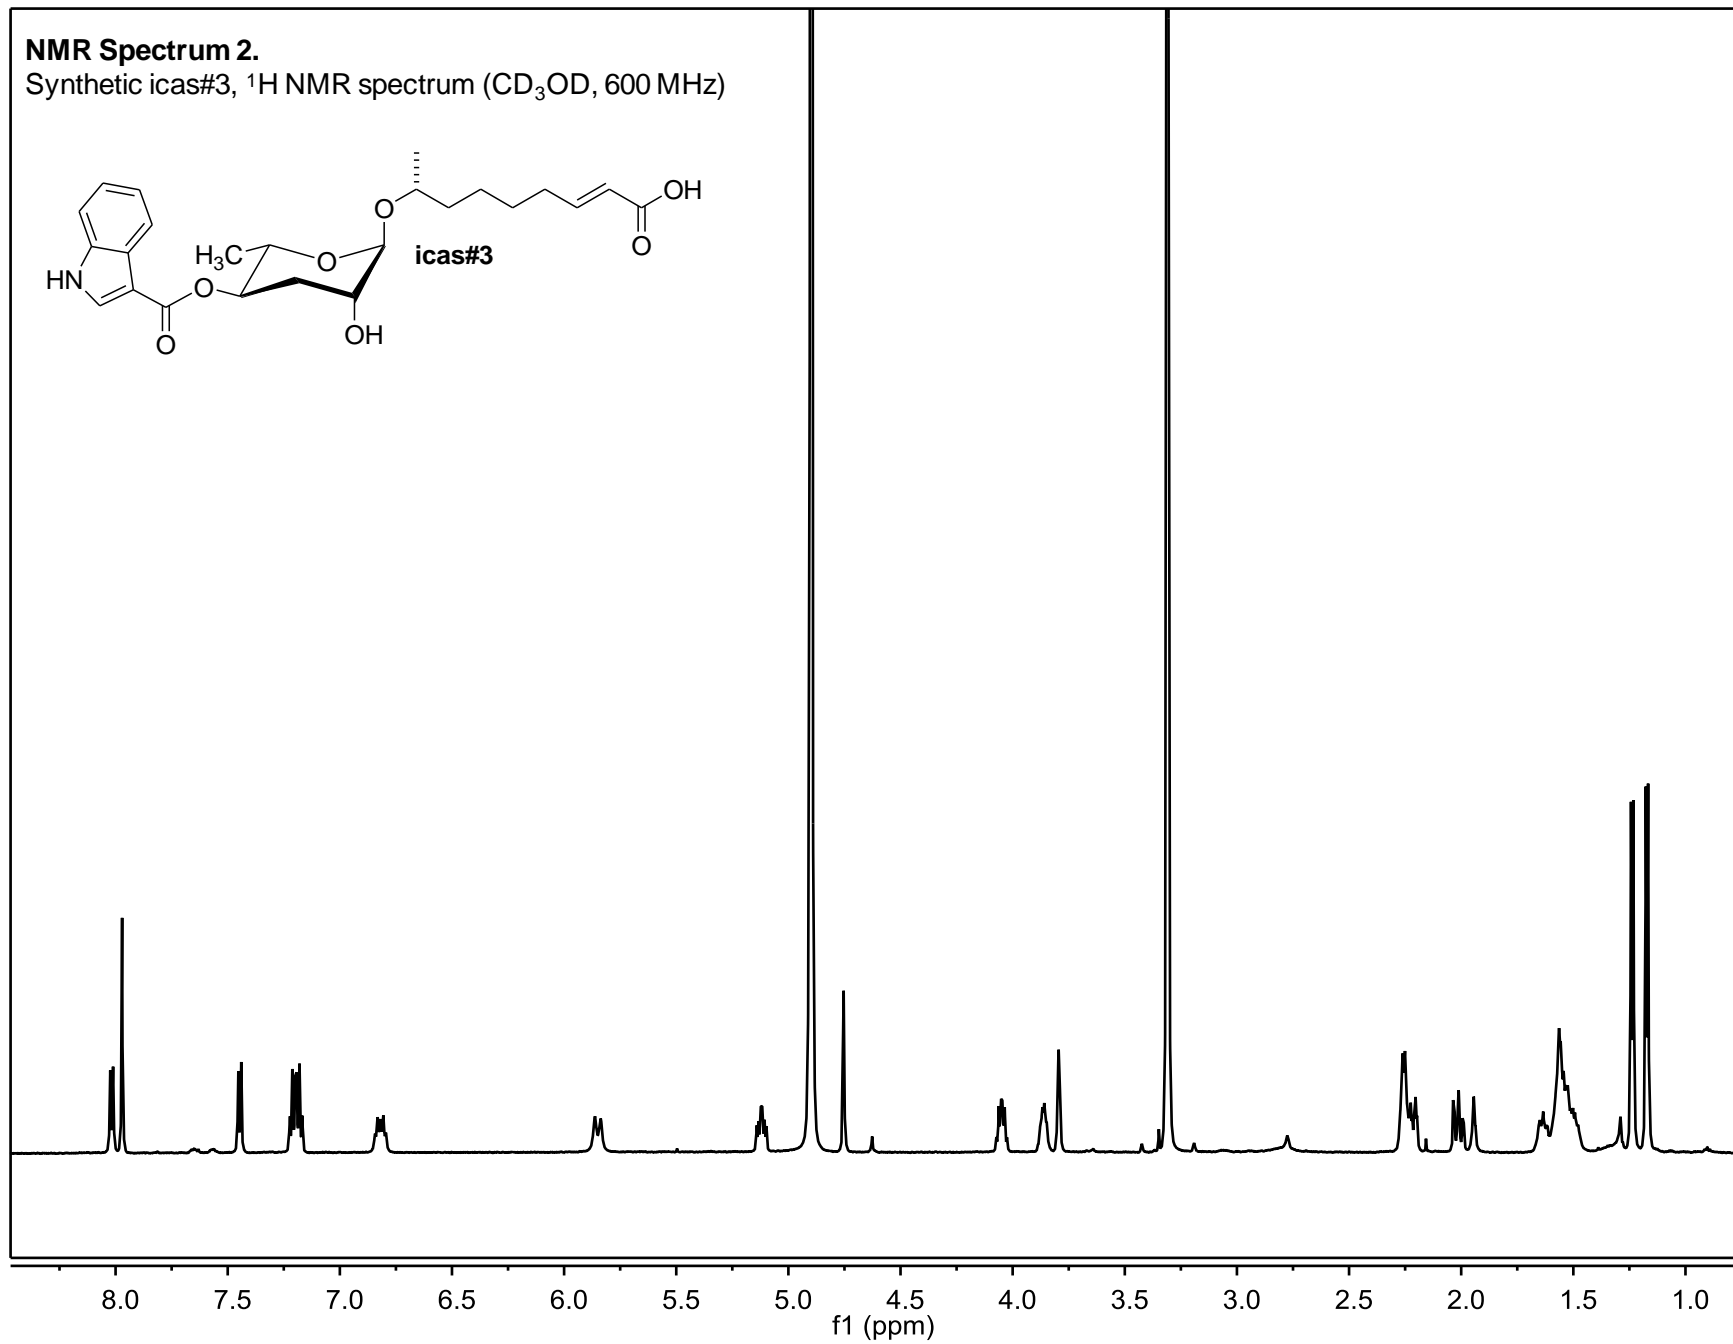

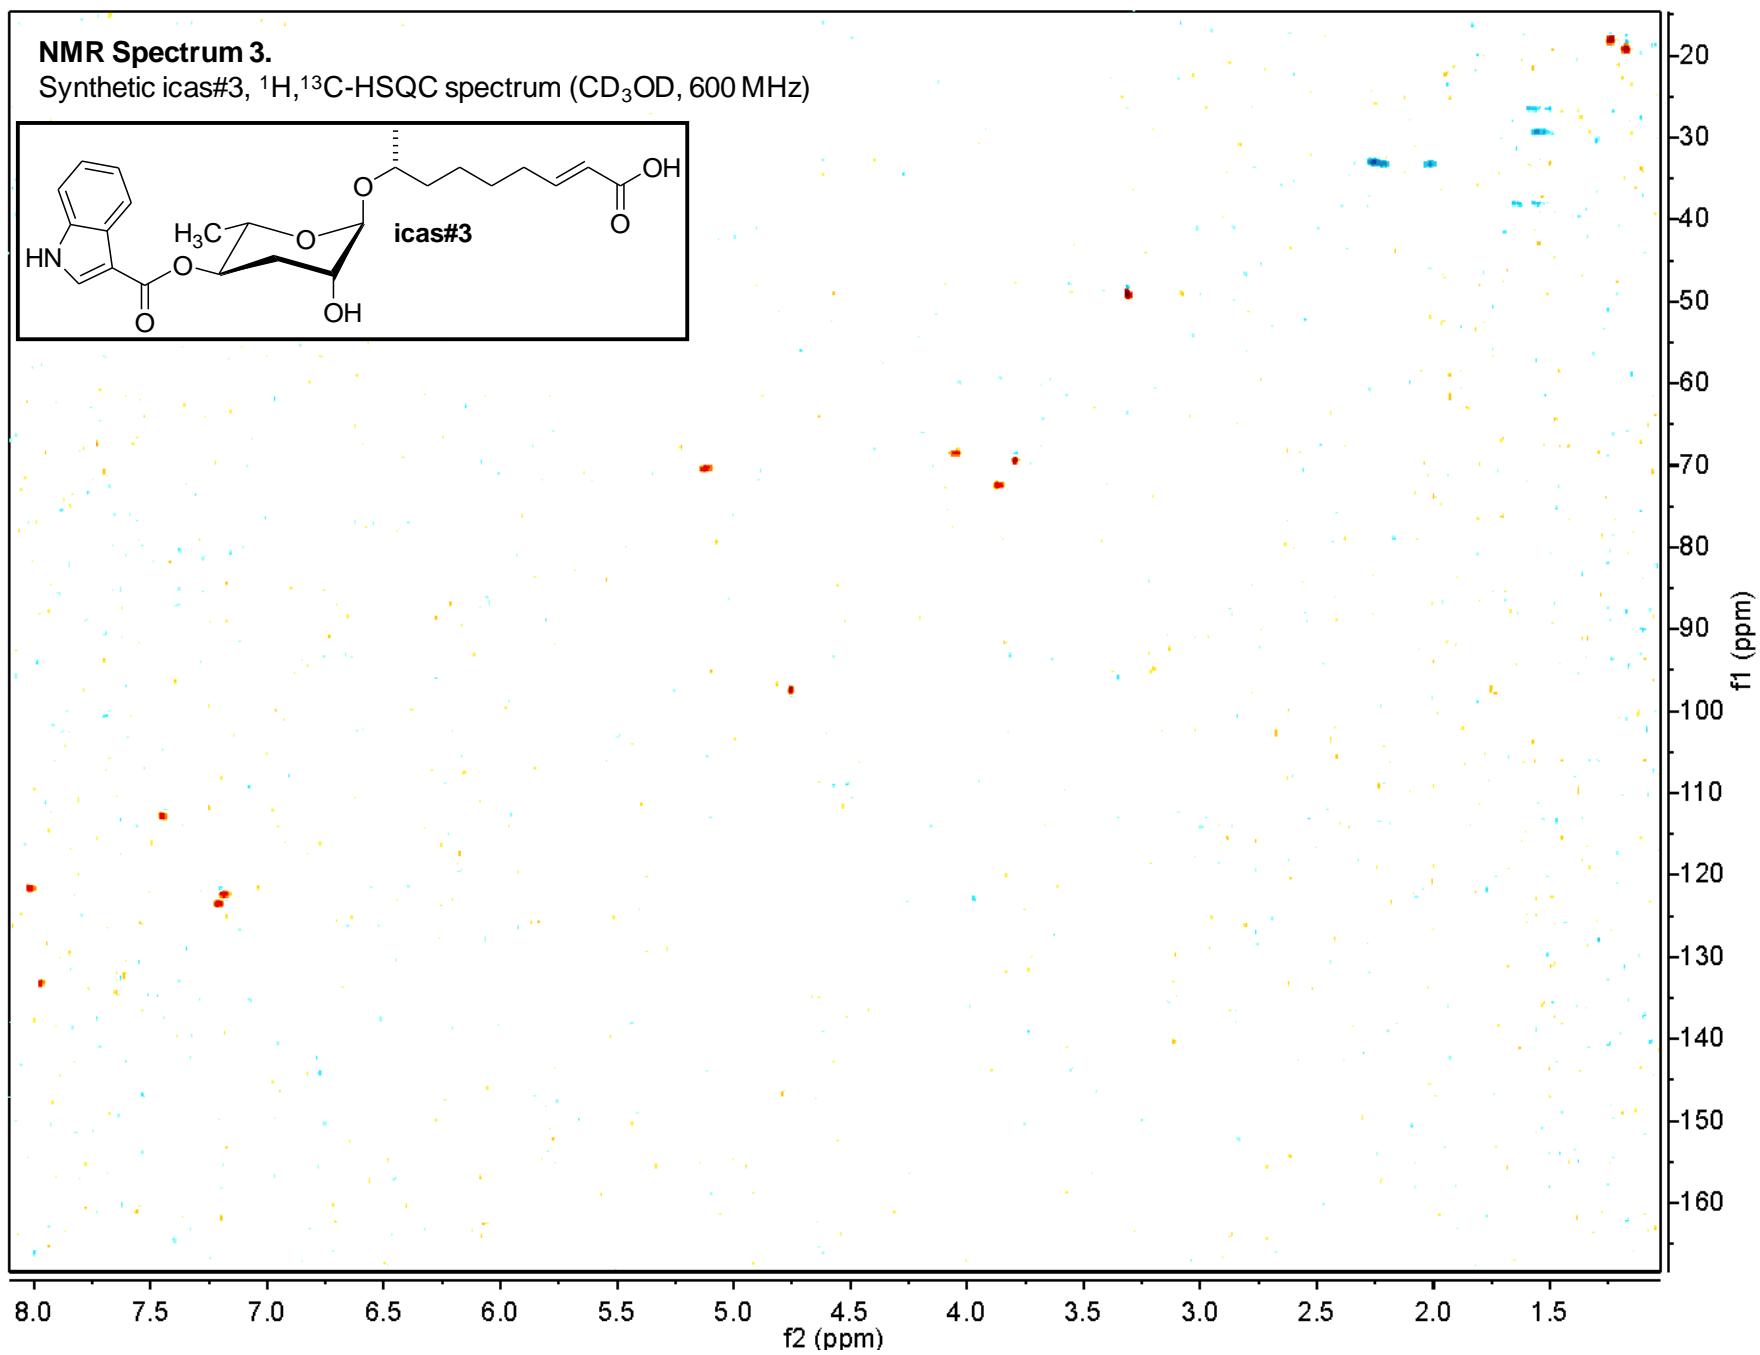

**NMR Spectrum 4.**Synthetic icas#3,  $^1\text{H}$ ,  $^{13}\text{C}$ -HMBC spectrum ( $\text{CD}_3\text{OD}$ , 600 MHz)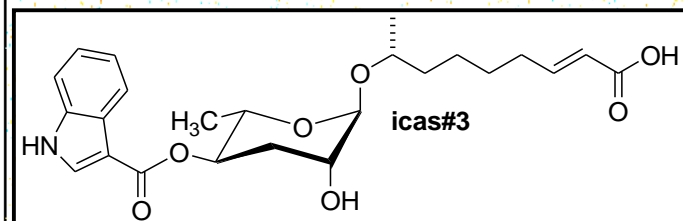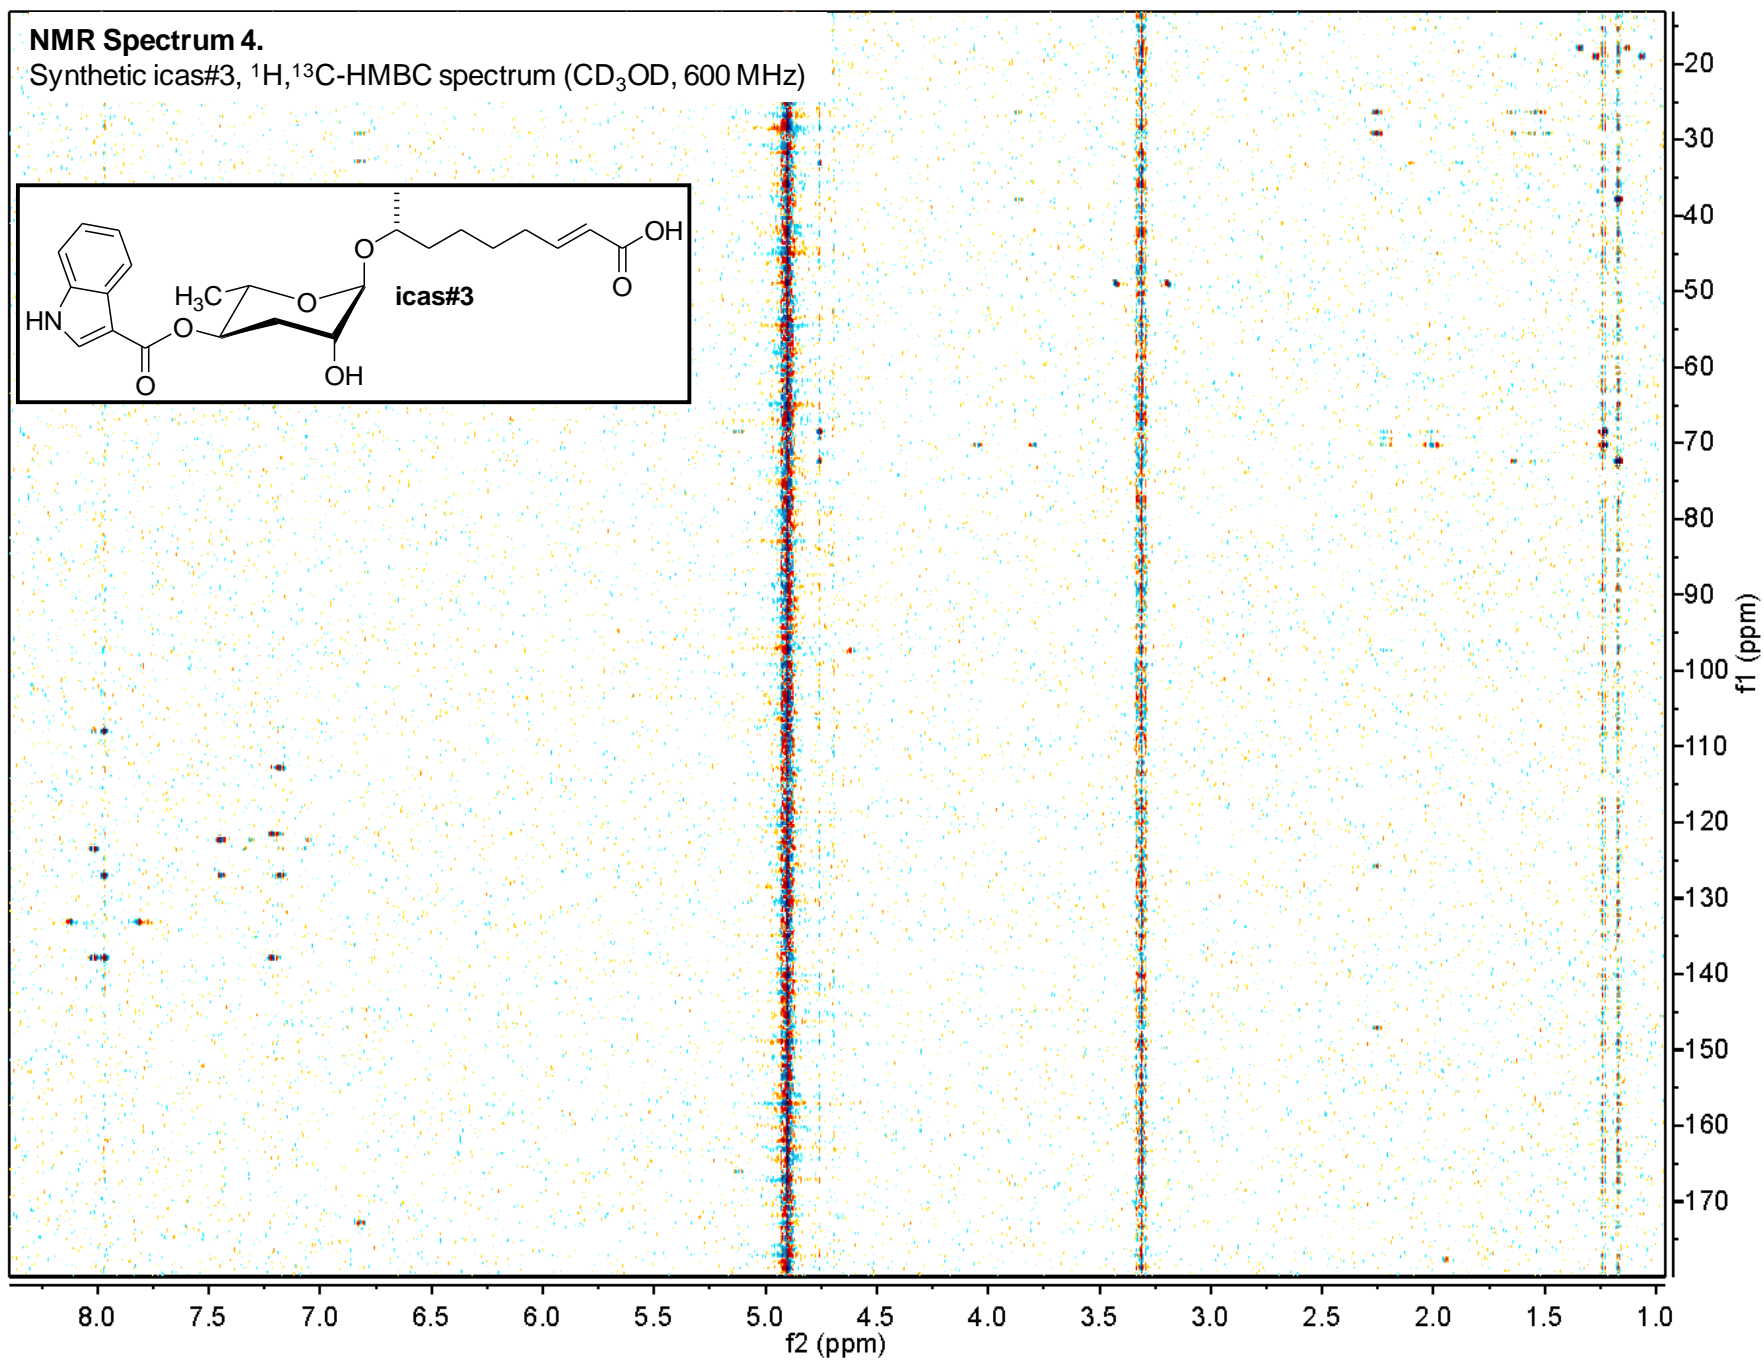

Supplement: pbio.1001237.s013.pdf [file pbio.1001237.s013.pdf]
